# Supplementary material for: Role of EDTA protonation in chelation-based removal of mercury ions from water
Source: Royal Society of Chemistry journal article supplement (doi:10.1039/d4cp02980a), 2024-01-01
Supplement: d4cp02980a1.pdf [file d4cp02980a1.pdf]

Electronic Supplementary Information (ESI)

## **Role of EDTA protonation in chelation-based removal of mercury ions from water**

Halyna Butovych,<sup>1,2</sup> Fatemeh Keshavarz,<sup>2</sup>  
Bernardo Barbiellini,<sup>2,4</sup> and Erkki Lähderanta,<sup>2,5</sup> Jaroslav Ilnytskyi,<sup>1,3</sup> Taras Patsahan\*,<sup>1,3</sup>

<sup>1</sup> Institute for Condensed Matter Physics of the National Academy of Sciences of Ukraine,  
1 Svientsitskii str., 79011, Lviv, Ukraine

<sup>2</sup> Department of Physics, School of Engineering Science, LUT University,  
FI-53850 Lappeenranta, Finland

<sup>3</sup> Institute of Applied Mathematics and Fundamental Sciences, Lviv Polytechnic National  
University, 12 S. Bandera Str., UA-79013 Lviv, Ukraine

<sup>4</sup> Department of Physics, Northeastern University, Boston, MA 02115, USA

<sup>5</sup> Department of Physics, Universitat de les Illes Balears, Cra Valldemossa, km. 7.5, 07122,  
Palma, Spain

\* Corresponding author: tarpa@icmp.lviv.ua

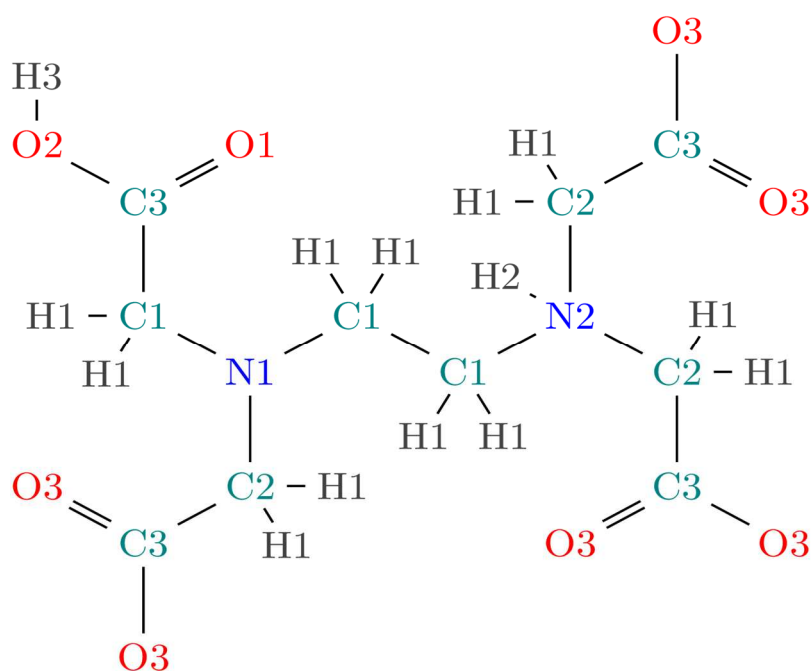

**Figure S1.** Atomistic model of EDTA<sup>2-</sup> described using the OPLS/AA force field. The OPLS/AA force field parameters are reported in Tables S1-S5.

**Table S1.** The non-bonding OPLS/AA parameters for EDTA and the Hg<sup>2+</sup> ion. Notations for the EDTA atoms correspond to those used in Figure S1. The parameters are used with the Lennard-Jones potential  $U_{LJ}(r) = 4\epsilon \left[ \left( \frac{\sigma}{r} \right)^{12} - \left( \frac{\sigma}{r} \right)^6 \right]$  and the Coulomb potential  $U_{coul}(r) = \frac{q_i q_j}{\epsilon r}$ .

| Type             | Charge | Mass   | $\epsilon$<br>(kcal mol <sup>-1</sup> ) | $\sigma$ (Å) |
|------------------|--------|--------|-----------------------------------------|--------------|
| N1               | -0.63  | 14.007 | 0.17                                    | 3.3          |
| N2               | -0.1   | 14.007 | 0.17                                    | 3.25         |
| C1               | 0.09   | 12.011 | 0.066                                   | 3.5          |
| C2               | -0.22  | 12.011 | 0.066                                   | 3.5          |
| C3               | 0.7    | 12.011 | 0.105                                   | 3.75         |
| H1               | 0.06   | 1.008  | 0.03                                    | 2.5          |
| H2               | 0.29   | 1.008  | 0.0                                     | 0.0          |
| H3               | 0.45   | 1.008  | 0.0                                     | 0.0          |
| O1               | -0.44  | 15.999 | 0.21                                    | 2.96         |
| O2               | -0.53  | 15.999 | 0.17                                    | 3.0          |
| O3               | -0.8   | 15.999 | 0.21                                    | 2.96         |
| Hg <sup>2+</sup> | 2      | 200.59 | 0.0409                                  | 2.36         |

**Table S2.** The OPLS/AA parameters for EDTA used for the harmonic bond stretching potential  $U_b(r) = K_b(r - r_0)^2$ . Notations for the EDTA atoms correspond to those in Figure S1.

| Bond        | $K_b$ (kcal mol <sup>-1</sup> Å <sup>-2</sup> ) | $r_0$ (Å) |
|-------------|-------------------------------------------------|-----------|
| C1-H1,C2-H1 | 340.0                                           | 1.09      |
| C1-N1,C2-N1 | 382.0                                           | 1.448     |
| C1-C1       | 268.0                                           | 1.529     |
| O2-H3       | 553.0                                           | 0.945     |
| C1-C3       | 317.0                                           | 1.522     |
| C3-O1       | 570.0                                           | 1.229     |
| C3-O2       | 450.0                                           | 1.364     |
| C3-O3       | 656.0                                           | 1.25      |
| N2-C1,N2-C2 | 367.0                                           | 1.471     |
| N2-H2       | 434.0                                           | 1.01      |

**Table S3.** The OPLS/AA parameters for EDTA used for the harmonic bond angle potential:  $U_a(\theta) = K_a(\theta - \theta_0)^2$ . Notations for the EDTA atoms correspond to those used in Figure S1.

| Angle              | $K_a$ (kcal mol <sup>-1</sup> rad <sup>-2</sup> ) | $\theta_0$ (°) |
|--------------------|---------------------------------------------------|----------------|
| O2-C3-O1           | 80.0                                              | 121.0          |
| O2-C3-C1           | 70.0                                              | 108.0          |
| O1-C3-C1           | 80.0                                              | 120.4          |
| O3-C3-C2           | 70.0                                              | 117.0          |
| O3-C3-O3           | 80.0                                              | 126.0          |
| C3-O2-H3           | 35.0                                              | 113.0          |
| N1-C1-C1           | 56.2                                              | 109.47         |
| N1-C1-C3,N1-C2-C3  | 80.0                                              | 111.2          |
| H1-C1-H1,H1-C2-H1  | 33.0                                              | 107.8          |
| C3-C1-H1,C3-C2-H1  | 35.0                                              | 109.5          |
| N1-C1-H1,N1-C2-H1  | 35.0                                              | 109.5          |
| C1-C1-H1           | 37.5                                              | 110.7          |
| C1-N1-C1,C1-N1-C2  | 51.8                                              | 107.2          |
| N2-C1-H1,N2-C2-H1  | 35.0                                              | 109.5          |
| N2-C2-C3,N2-C1-C1  | 80.0                                              | 111.2          |
| C1-N2-C2, C2-N2-C2 | 50.0                                              | 113.0          |
| C1-N2-H2,C2-N2-H2  | 35.0                                              | 109.5          |

**Table S4.** The OPLS/AA parameters for EDTA used for the dihedral angle potential:

$$U_{dih}(\phi) = \frac{1}{2}K_1[1 + \cos(\phi)] + \frac{1}{2}K_2[1 - \cos(2\phi)] + \frac{1}{2}K_3[1 + \cos(3\phi)] + \frac{1}{2}K_4[1 - \cos(4\phi)].$$

Notations for the EDTA atoms correspond to those used in Figure S1.

| Dihedral                    | $K_1$ (kcal mol <sup>-1</sup> ) | $K_2$ (kcal mol <sup>-1</sup> ) | $K_3$ (kcal mol <sup>-1</sup> ) | $K_4$ (kcal mol <sup>-1</sup> ) |
|-----------------------------|---------------------------------|---------------------------------|---------------------------------|---------------------------------|
| O1-C3-O2-H3                 | 0                               | 5.0                             | 0                               | 0                               |
| C1-C3-O2-H3                 | 1.5                             | 5.5                             | 0                               | 0                               |
| O1-C3-C1-N1                 | 0                               | 0.82                            | 0                               | 0                               |
| O1-C3-C1-H1                 | 0                               | 0                               | 0                               | 0                               |
| O2-C3-C1-N1                 | 5.26                            | 0.82                            | 0                               | 0                               |
| O2-C3-C1-H1                 | 0                               | 0                               | 0                               | 0                               |
| O3-C3-C2-N1                 | 0                               | 0.82                            | 0                               | 0                               |
| O3-C3-C2-H1                 | 0                               | 0                               | 0                               | 0                               |
| N1-C1-C1-N1                 | 11.035                          | -0.968                          | 0.27                            | 0                               |
| N1-C1-C1-H1                 | -1.013                          | -0.709                          | 0.473                           | 0                               |
| H1-C1-C1-H1                 | 0                               | 0                               | 0.3                             | 0                               |
| C1-C1-N1-C1,<br>C1-C1-N1-C2 | 0.416                           | -0.128                          | 0.695                           | 0                               |
| C1-N1-C1-H1,<br>C2-N1-C1-H1 | 0                               | 0                               | 0.56                            | 0                               |
| N2-C1-C1-H1                 | 0                               | 0                               | 0.384                           | 0                               |
| C1-C1-N2-C2                 | 1.438                           | -0.124                          | 0.264                           | 0                               |
| C2-N2-C1-H1,<br>C1-N2-C1-H1 | 0                               | 0                               | 0.302                           | 0                               |
| H1-C1-N2-H2,<br>H1-C2-N2-H2 | 0                               | 0                               | 0.3                             | 0                               |
| C1-N2-C2-C3,<br>C2-N2-C2-C3 | 1.438                           | -0.124                          | 0.264                           | 0                               |
| C3-C2-N2-H2,<br>C1-C1-N2-H2 | 0                               | 0                               | 0.347                           | 0                               |

**Table S5.** The OPLS/AA parameters for EDTA used for the improper dihedral angle potential:  $U_{imp}(\chi) = K_{imp}(\chi - \chi_0)^2$ . Notations for the EDTA atoms correspond to those used in Figure S1.

| Improper                                                    | $K_{imp}$ (kcal mol <sup>-1</sup> rad <sup>-2</sup> ) | $\chi_0$ (°) |
|-------------------------------------------------------------|-------------------------------------------------------|--------------|
| O3-C2-C3-O3,<br>O3-O3-C3-C2,<br>O1-O2-C3-C1,<br>O2-C1-C3-O1 | 10.5                                                  | 180.0        |

**Table S6.** Root-mean-square deviation of the EDTA<sup>4-</sup>-Hg<sup>2+</sup>-water complex in water solvent optimized at various computational levels relative to the experimentally resolved structure using X-ray absorption spectroscopy [1].<sup>a</sup>

| Functional | Basis set  | Solvent model | RMSD (Å) |
|------------|------------|---------------|----------|
| B3LYP      | Def2-TZVPP | SMD           | 1.069    |
| HSE06      | Def2-TZVPP | SMD           | 1.257    |
| M05-2X     | Def2-TZVPP | SMD           | 0.941    |
| PBE        | Def2-TZVPP | SMD           | 1.285    |
| PBE0       | Def2-TZVPP | SMD           | 1.089    |
| ωB97X-D    | Def2-TZVPP | SMD           | 1.350    |
| M05-2X     | Def2-TZVP  | SMD           | 1.107    |
| M05-2X     | LanL2DZ    | SMD           | 0.694    |
| M05-2X     | LanL2DZ    | CPCM          | 0.769    |
| M05-2X     | LanL2DZ    | PCM           | 0.769    |
| UM05-2X    | LanL2DZ    | SMD           | 0.700    |
| UωB97X-D   | Def2-TZVPP | SMD           | 1.141    |

<sup>a</sup> The starting and optimized structures are shown in Figure S2.

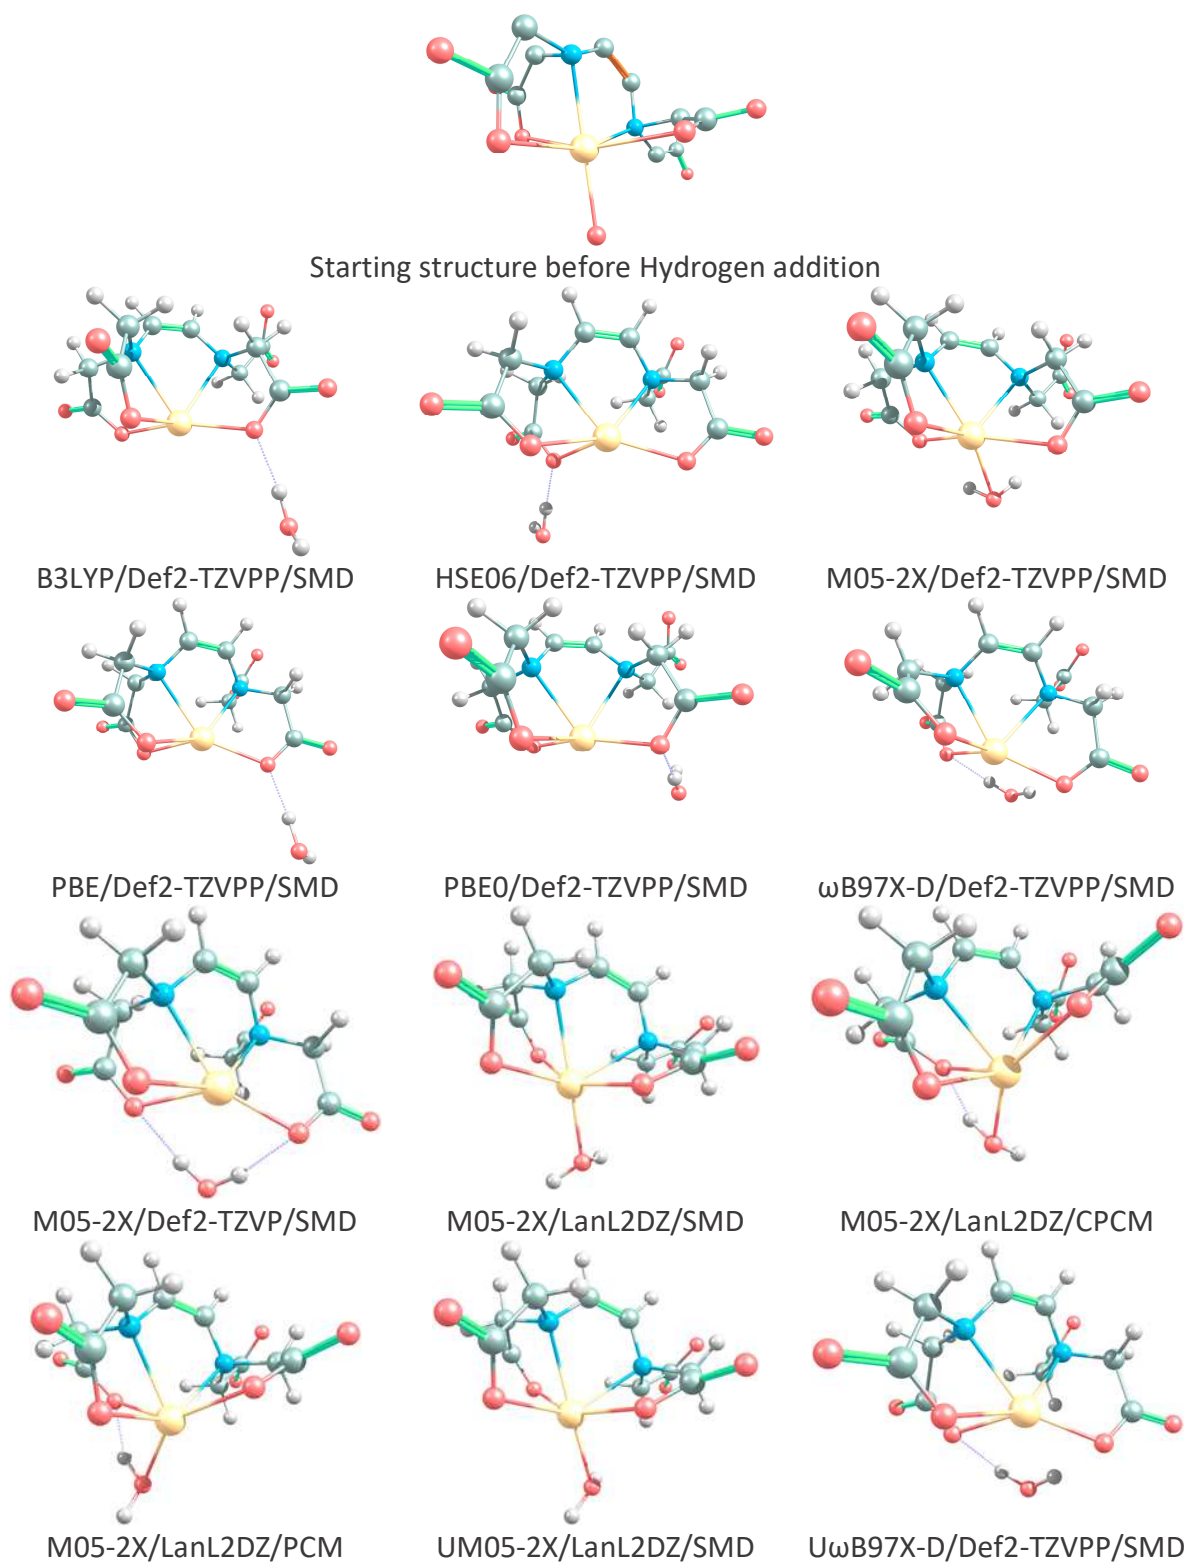

**Figure S2.** The starting and optimized structures of the EDTA<sup>4-</sup>-Hg<sup>2+</sup>-water complex in implicit water solvent. The backbone of the starting structure is adopted from Ref. [1] and the missing hydrogens are added to it. The grey, red, blue, white, and yellow balls represent the carbon, oxygen, nitrogen, hydrogen, and mercury atoms, respectively.

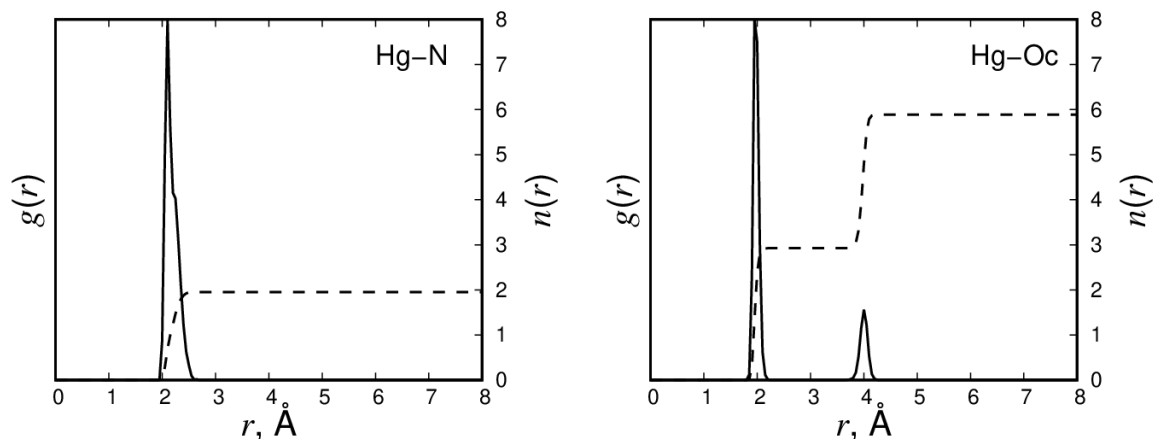

**Figure S3.** The radial distribution functions  $g(r)$  (solid line) and running coordination functions  $n(r)$  (dashed line) for  $thEDTA^{3-}+Hg^{2+}$ .

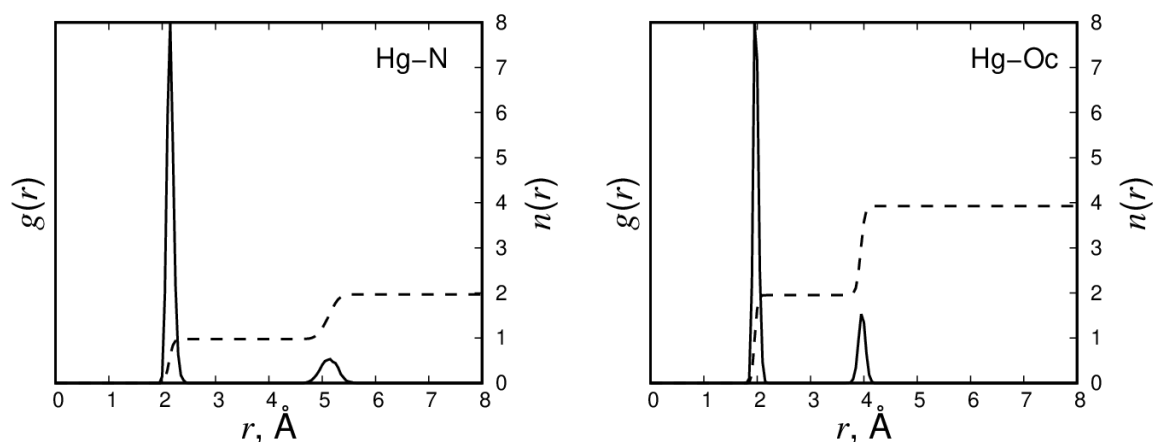

**Figure S4.** The radial distribution functions  $g(r)$  (solid line) and running coordination functions  $n(r)$  (dashed line) for  $thEDTA_a^{2-}+Hg^{2+}$ .

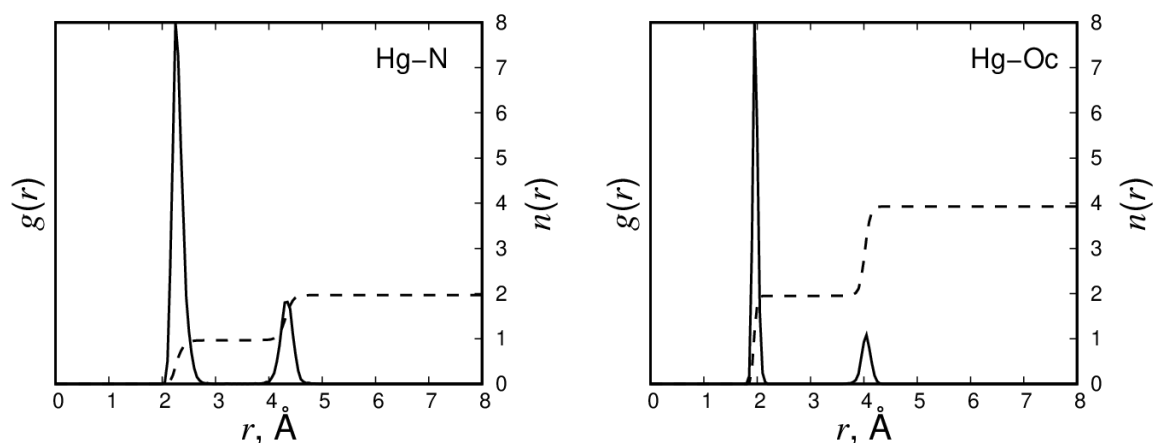

**Figure S5.** The radial distribution functions  $g(r)$  (solid line) and running coordination functions  $n(r)$  (dashed line) for  $thEDTA_o^{2-}+Hg^{2+}$ .

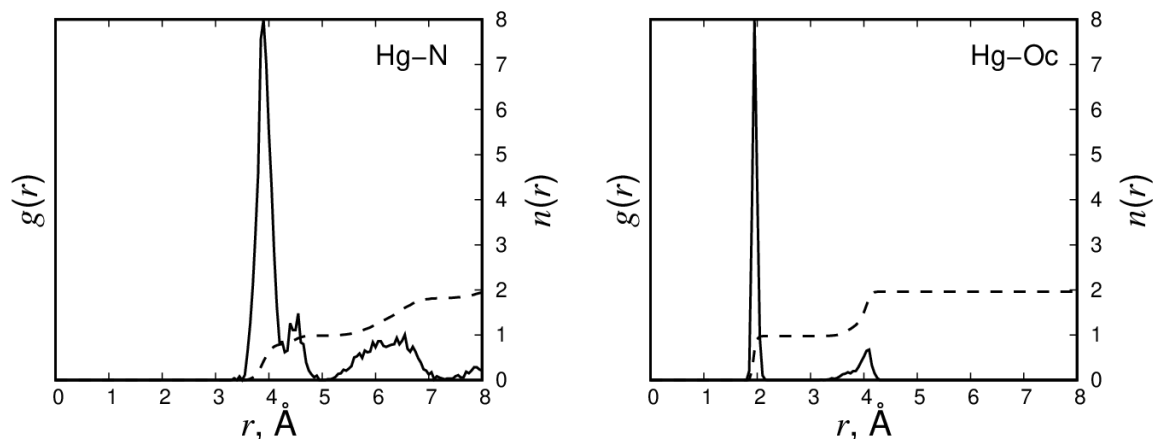

**Figure S6.** The radial distribution functions  $g(r)$  (solid line) and running coordination functions  $n(r)$  (dashed line) for  $thEDTA^{1-}+Hg^{2+}$ .

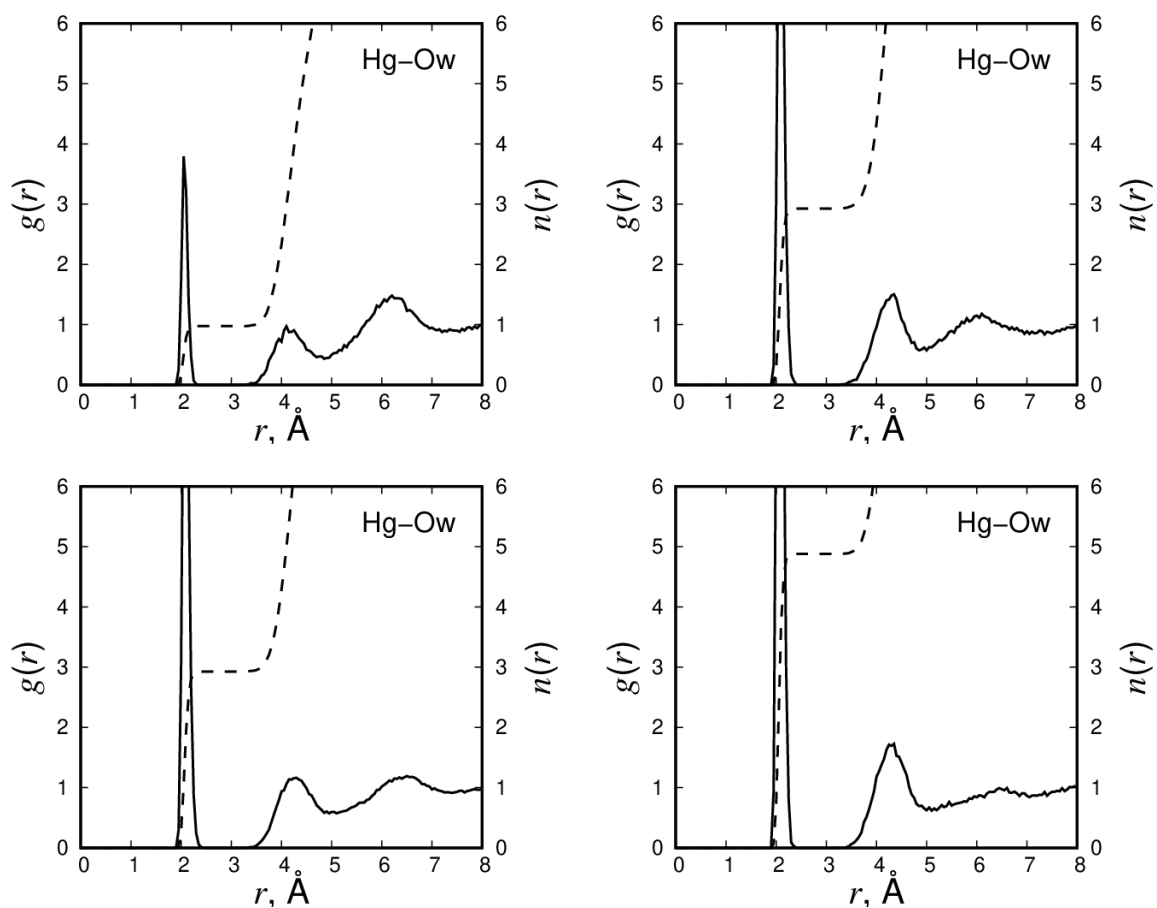

**Figure S7.** The radial distribution functions  $g(r)$  (solid line) and running coordination functions  $n(r)$  (dashed line) of  $Hg^{2+}$ -Ow in the different complexes of  $thEDTA+Hg^{2+}$ .



EDTA<sup>4-</sup>

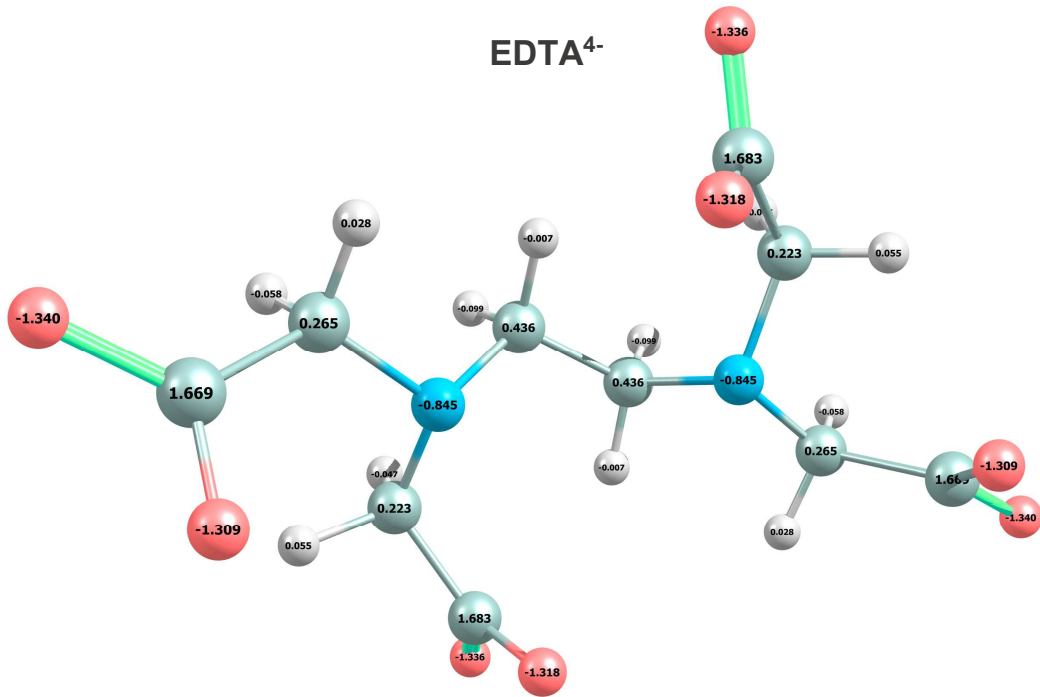

EDTA<sup>3-</sup>

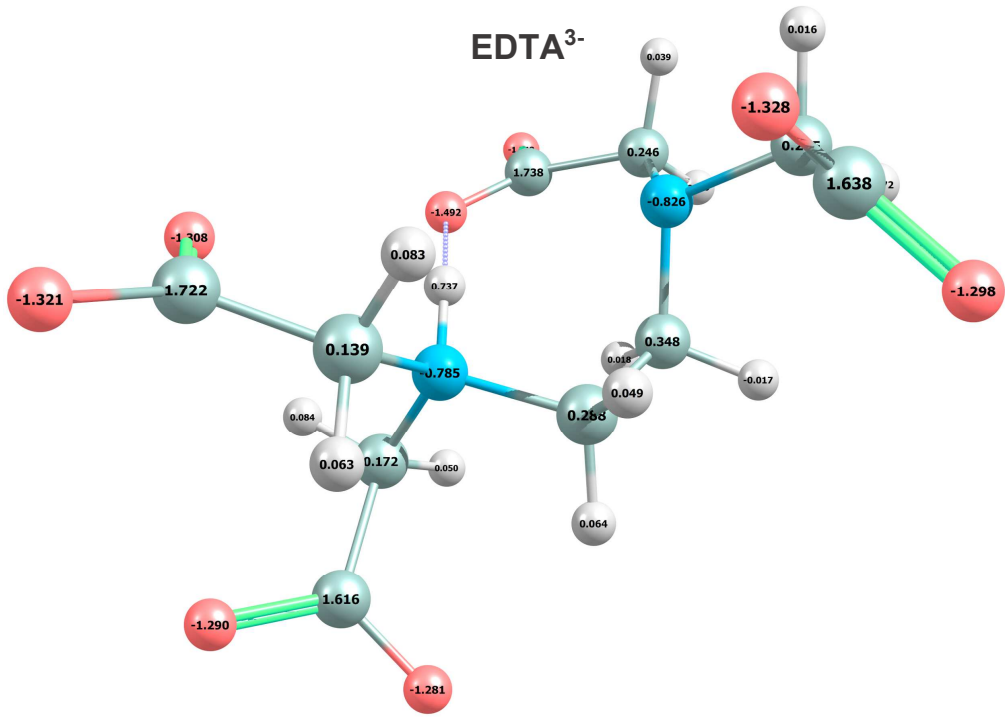

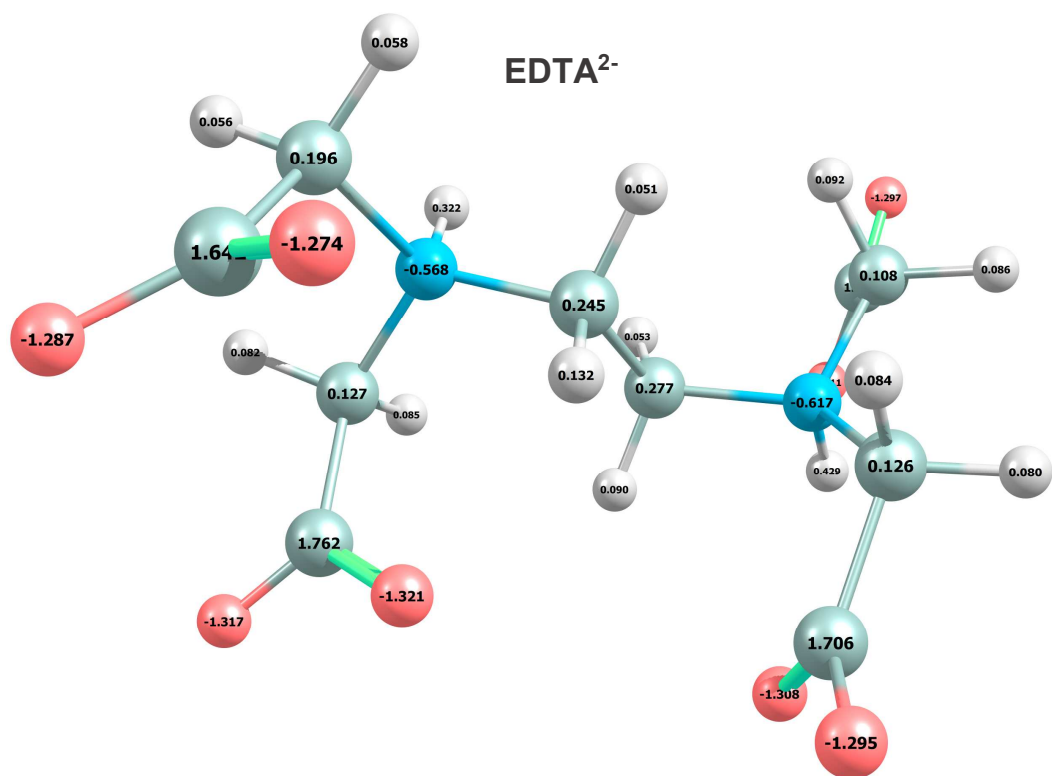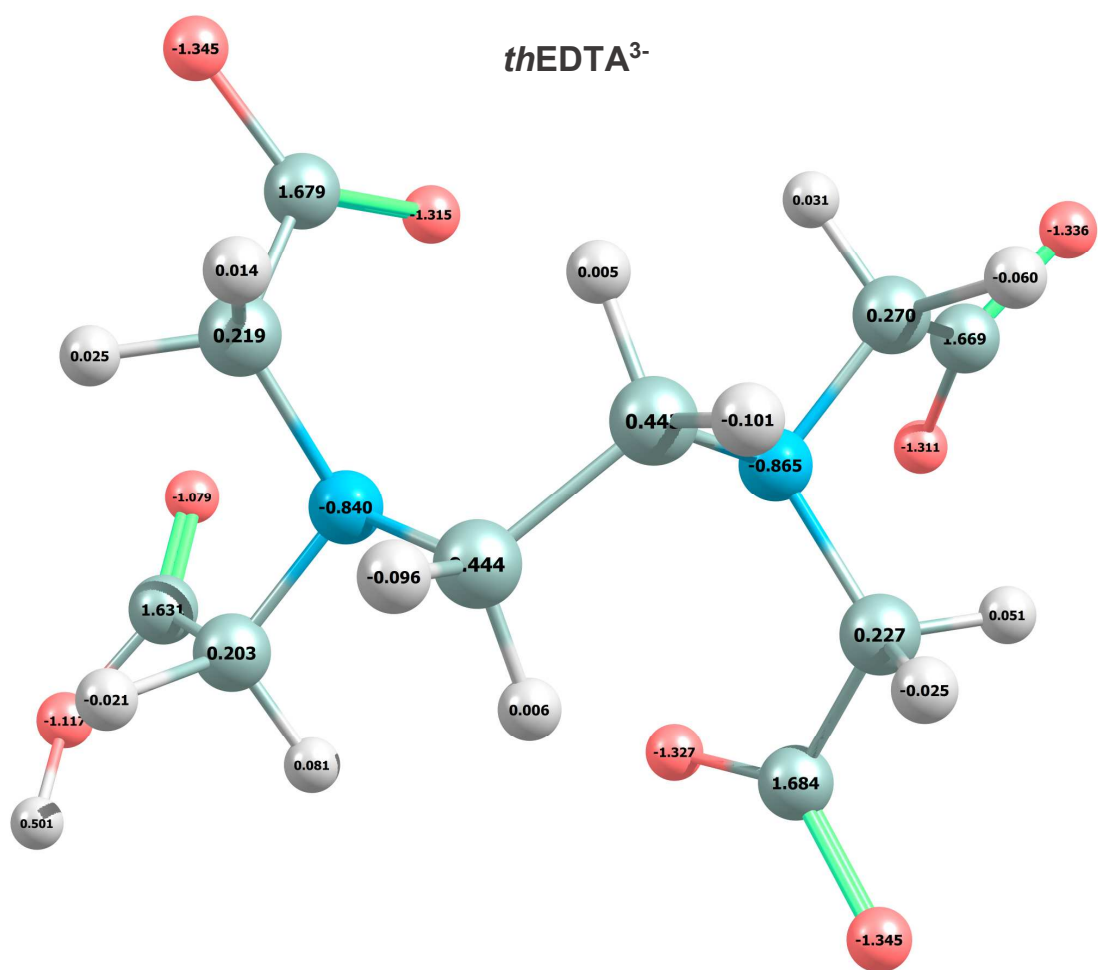

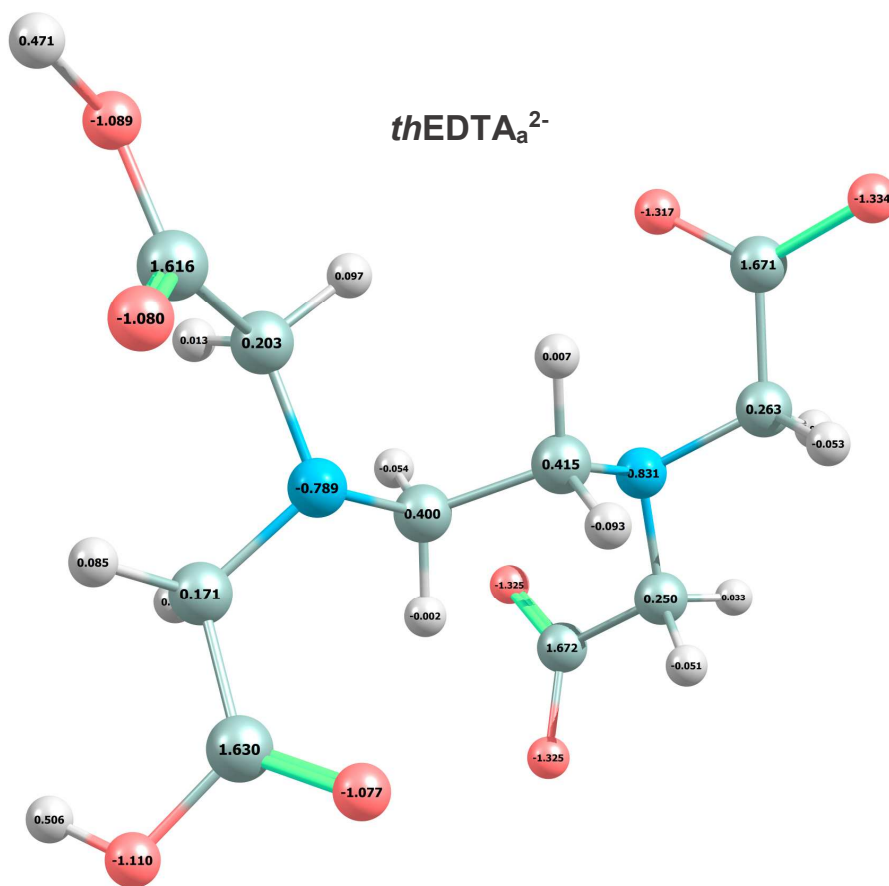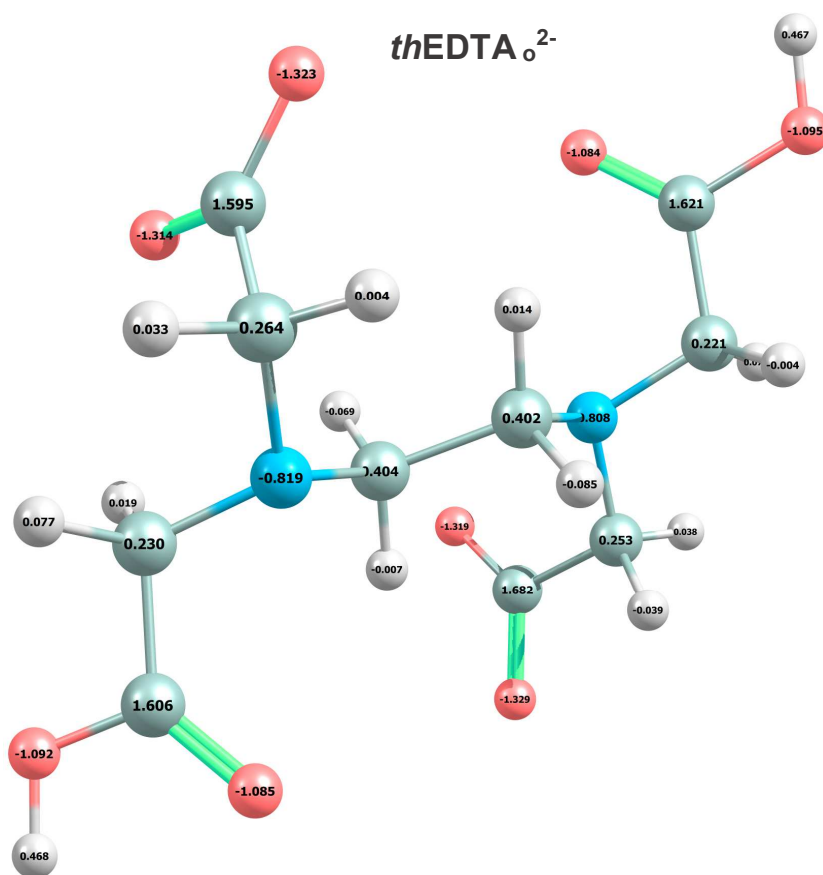

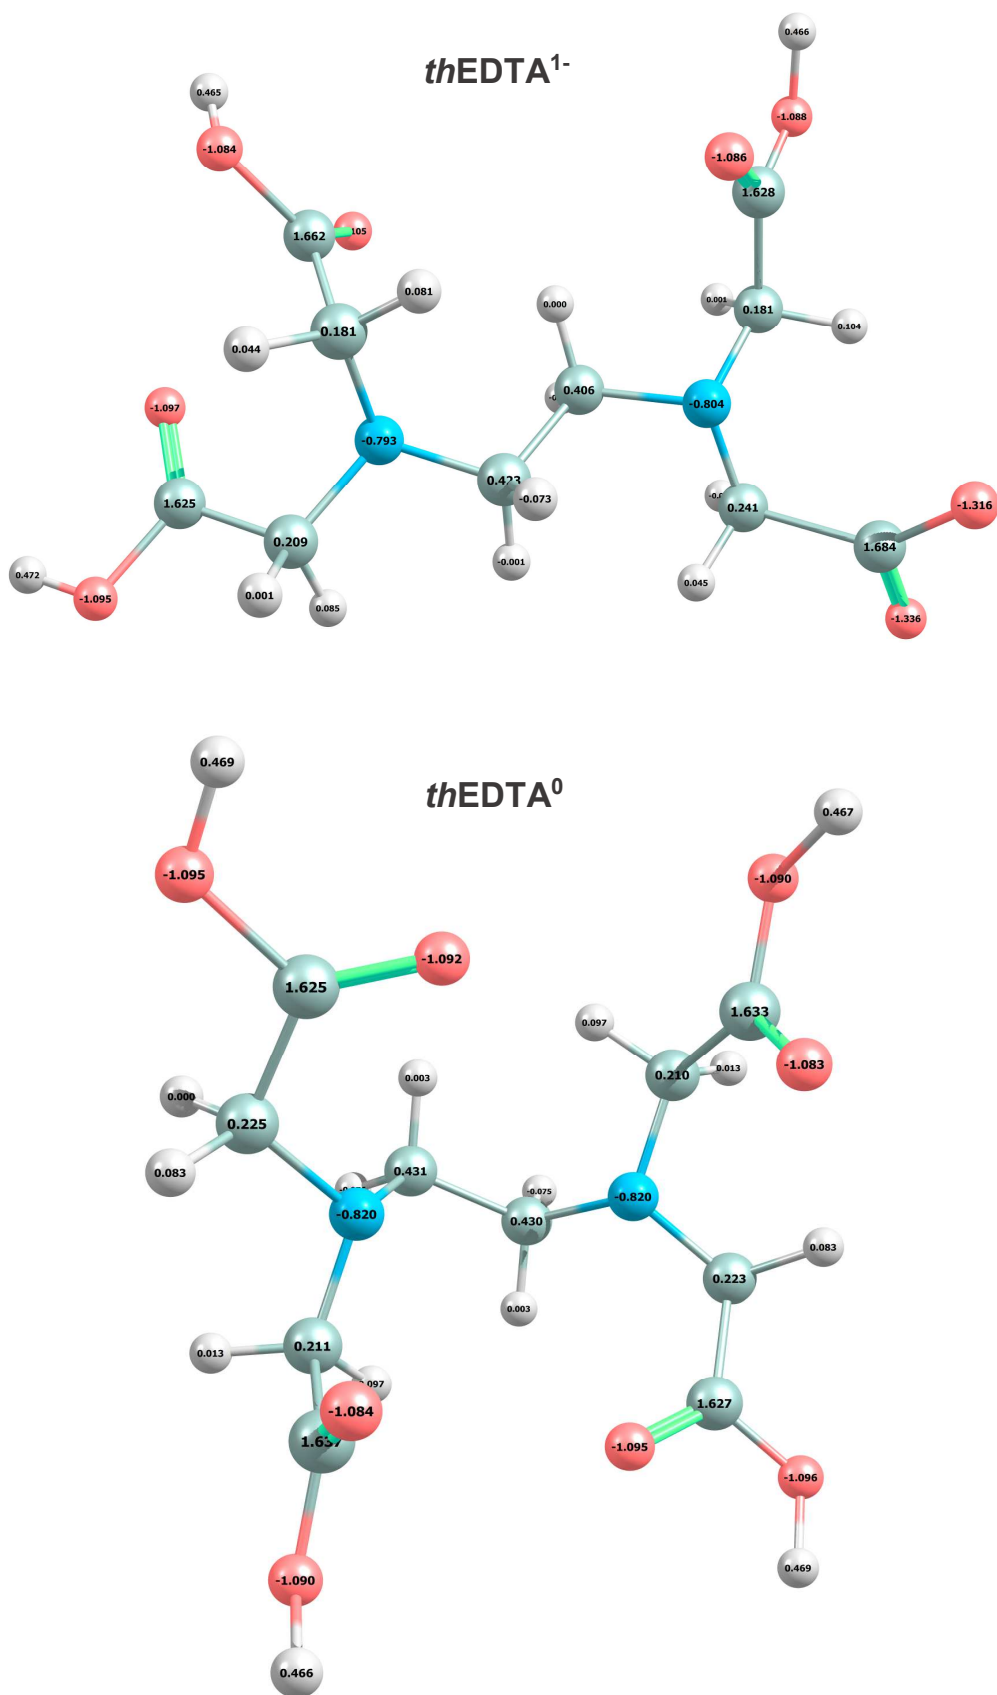

**Figure S8.** The APT partial charges of EDTA at different protonation states. The grey, red, blue, white, and yellow balls represent the carbon, oxygen, nitrogen, hydrogen, and mercury atoms, respectively.

### EDTA<sup>4-</sup>/Hg<sup>2+</sup>

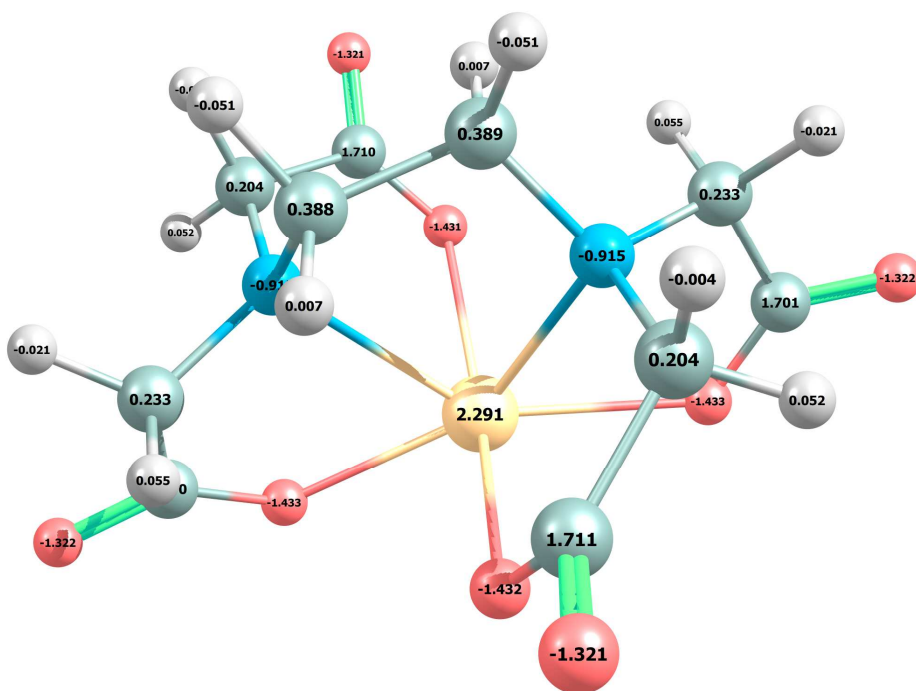

### EDTA<sup>3-</sup>/Hg<sup>2+</sup>

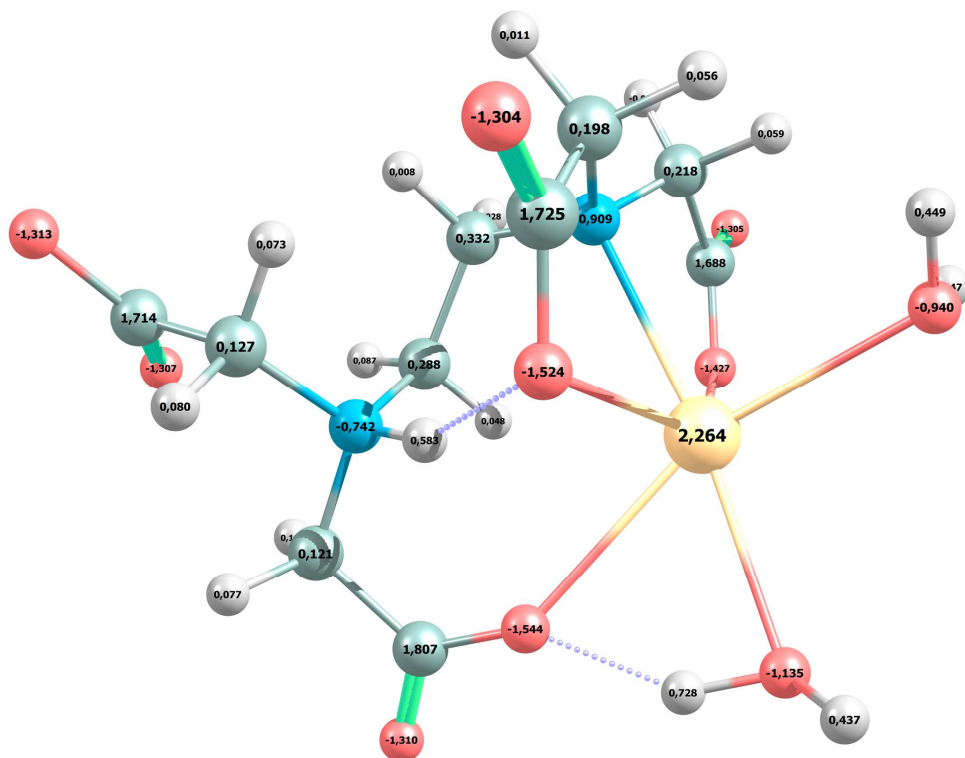

### EDTA<sup>2-</sup>/Hg<sup>2+</sup>

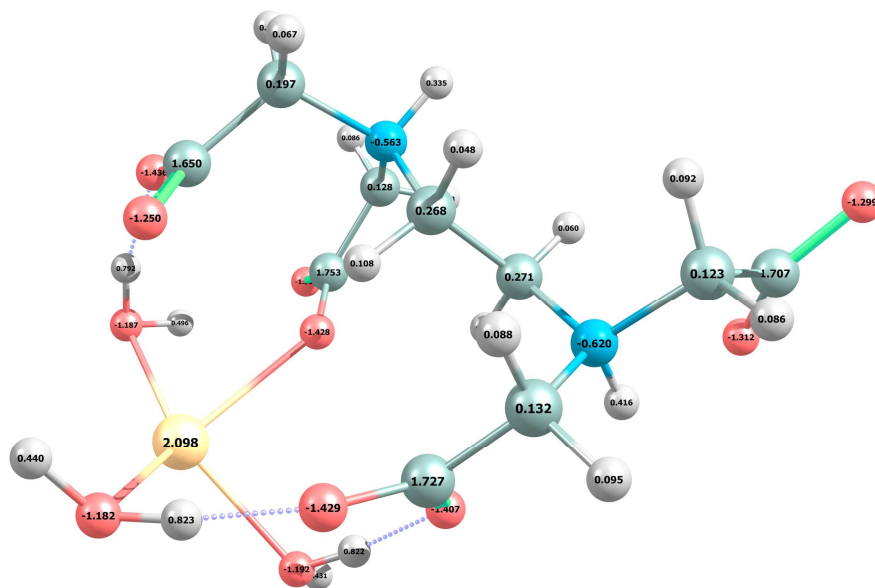

### thEDTA<sup>3-</sup>/Hg<sup>2+</sup>

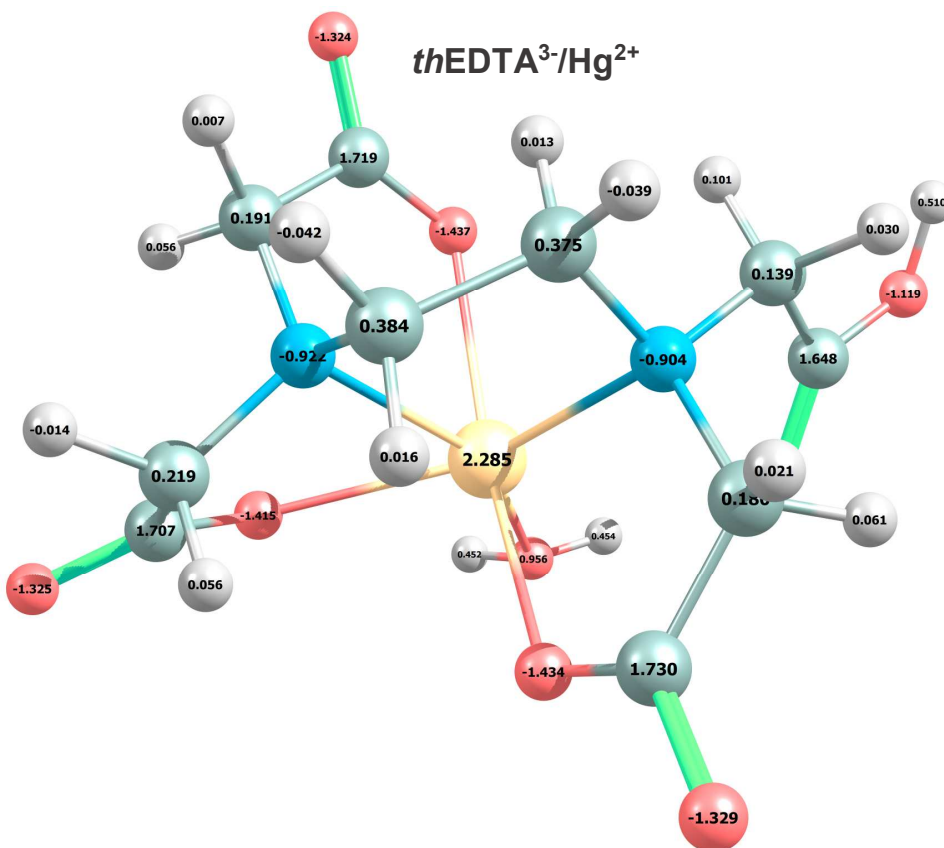

*th*EDTA<sub>a</sub><sup>2-</sup>/Hg<sup>2+</sup>

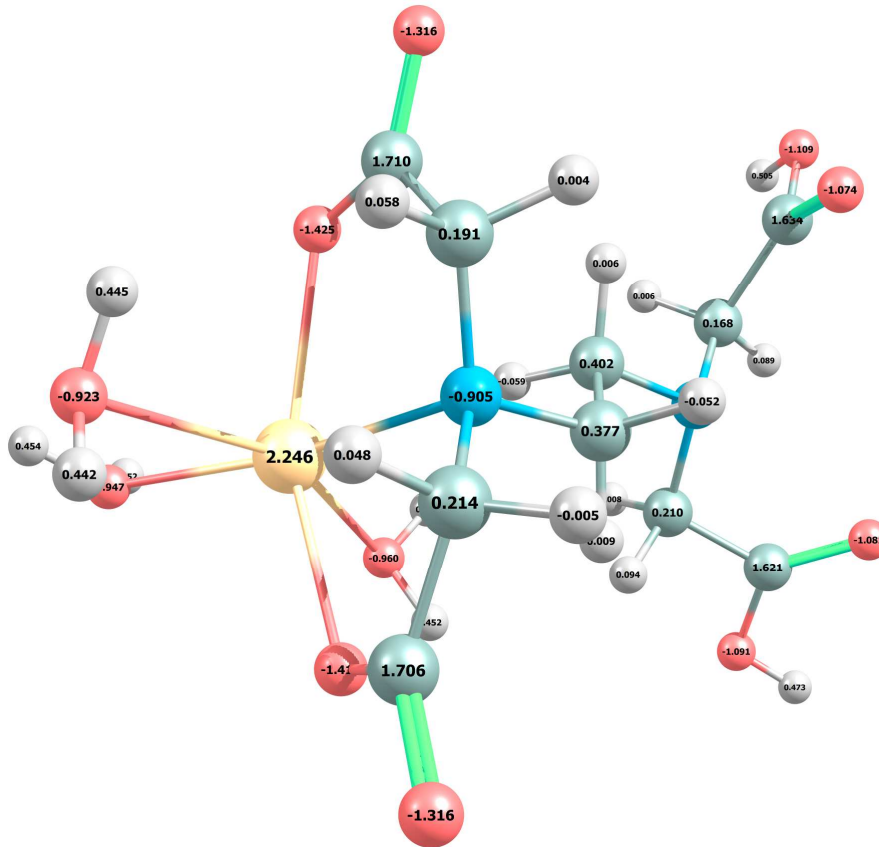

*th*EDTA<sub>o</sub><sup>2-</sup>/Hg<sup>2+</sup>

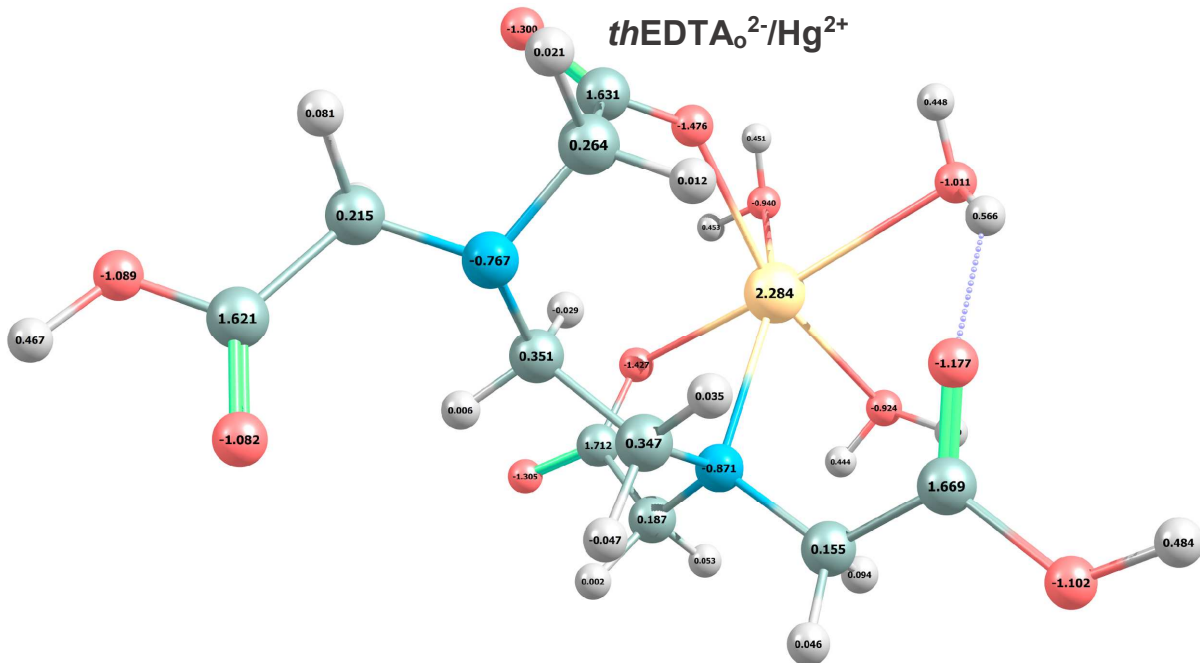

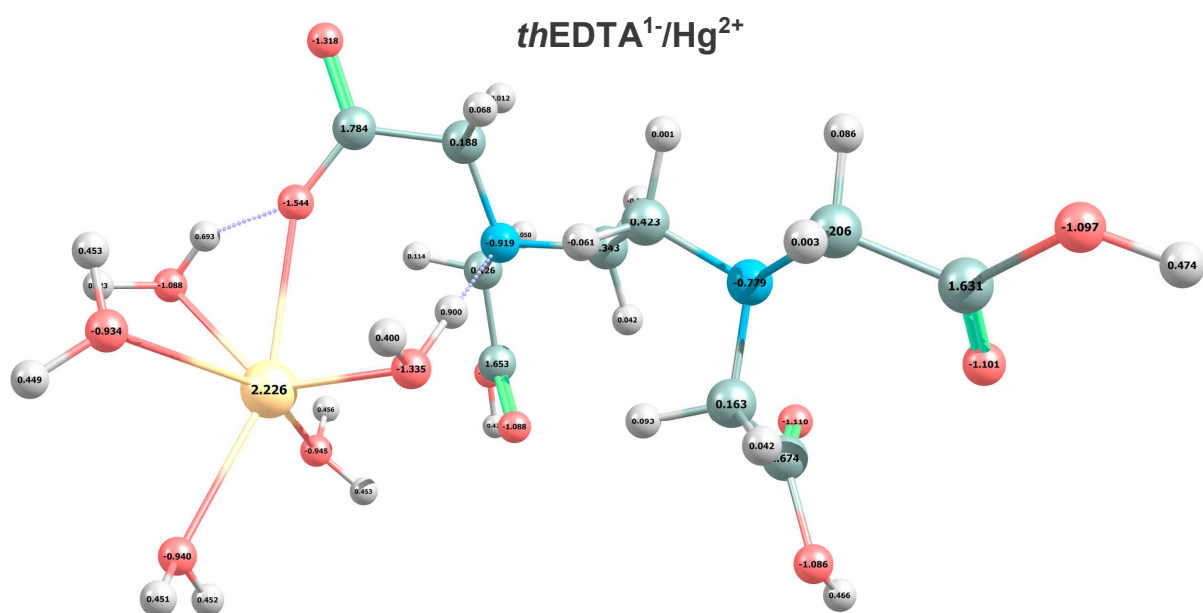

**Figure S9.** The APT partial charges of the EDTA-Hg<sup>2+</sup> complexes at different protonation states. The grey, red, blue, white, and yellow balls represent the carbon, oxygen, nitrogen, hydrogen, and mercury atoms, respectively.



## Atomic coordinates

The atomic coordinates of EDTA and the EDTA-Hg<sup>2+</sup> complexes optimized at different protonation states and the M05-2X/LanL2DZ/SMD computational level are as follows.

### EDTA<sup>4-</sup>

```
O      1.371805  3.649116 -0.781571
O      4.855611 -1.479683  0.604243
O     -1.369595 -3.648520 -0.782307
O     -4.856097  1.479307  0.604106
O      0.781509  2.431556  1.054558
O      3.514692 -0.039794  1.761314
O     -0.782042 -2.431373  1.054973
O     -3.515164  0.039390  1.761110
N      1.643559  0.026335 -0.395932
N     -1.643784 -0.026286 -0.395950
C      0.655223 -0.390978 -1.422953
C     -0.655457  0.391259 -1.422877
C      2.154094  1.380658 -0.678342
C      2.746541 -0.950343 -0.383249
C     -2.154027 -1.380728 -0.678444
C     -2.746964  0.950158 -0.383355
C      1.358357  2.547335 -0.093637
C      3.763555 -0.790510  0.743719
C     -1.357805 -2.547086 -0.093790
C     -3.764005  0.790179  0.743569
H      1.104251 -0.275567 -2.424866
H      0.454825 -1.456460 -1.293607
H     -0.455042  1.456702 -1.293234
H     -1.104482  0.276073 -2.424817
H      2.250693  1.550639 -1.760208
H      3.154026  1.477031 -0.246122
H      3.309851 -0.945379 -1.330051
H      2.324069 -1.953670 -0.271196
H     -2.250612 -1.550649 -1.760315
H     -3.153894 -1.477339 -0.246140
H     -3.310237  0.945038 -1.330181
H     -2.324706  1.953577 -0.271344
```

### EDTA<sup>3-</sup>

```
O     -3.96561 -0.54137 -0.83870
O     -2.17651  1.38491  1.83289
O      1.94030  3.87040 -0.27963
O      2.90630 -3.07956 -0.34874
O     -2.69123 -1.06480 -2.66370
O     -3.18913 -0.51728  2.60839
O      0.35126  2.31481  0.21224
O      2.05933 -2.30704  1.62751
```

|   |          |          |          |
|---|----------|----------|----------|
| N | -0.84476 | -0.03481 | -0.17348 |
| N | 2.13647  | 0.21412  | -0.07481 |
| C | 0.10975  | -0.94051 | -0.93167 |
| C | 1.37282  | -0.16632 | -1.28916 |
| C | -1.85344 | 0.59377  | -1.10952 |
| C | -1.46244 | -0.76721 | 0.97836  |
| C | 2.65407  | 1.58712  | -0.14575 |
| C | 3.23365  | -0.74261 | 0.19832  |
| C | -2.91030 | -0.41348 | -1.57142 |
| C | -2.35175 | 0.10902  | 1.85349  |
| C | 1.57042  | 2.65489  | -0.06988 |
| C | 2.69610  | -2.13850 | 0.51363  |
| H | 0.34017  | -1.79214 | -0.29563 |
| H | -0.39717 | -1.30126 | -1.82580 |
| H | 1.98235  | -0.78703 | -1.95792 |
| H | 1.10165  | 0.73254  | -1.84946 |
| H | -1.29431 | 0.97530  | -1.96212 |
| H | -2.32694 | 1.41197  | -0.57515 |
| H | -0.64413 | -1.13670 | 1.60110  |
| H | -2.02278 | -1.62268 | 0.60545  |
| H | 3.23774  | 1.77187  | -1.05950 |
| H | 3.32276  | 1.76144  | 0.70148  |
| H | 3.78903  | -0.39061 | 1.06976  |
| H | 3.91715  | -0.81260 | -0.65784 |
| H | -0.27830 | 0.79709  | 0.18311  |

**EDTA<sup>2-</sup>**

|   |          |          |          |
|---|----------|----------|----------|
| O | -1.97107 | 1.18939  | 0.69108  |
| O | -2.90677 | -0.02958 | -2.22831 |
| O | 4.65006  | -2.25226 | -0.16827 |
| O | 1.26150  | 2.68631  | 0.91975  |
| O | -3.03335 | 0.47625  | 2.58594  |
| O | -4.26925 | -0.63590 | -0.48946 |
| O | 3.96795  | -0.67566 | 1.35562  |
| O | 0.25964  | 3.38519  | -1.02262 |
| N | -1.19979 | -1.57730 | 0.08620  |
| N | 2.09929  | 0.35178  | -0.19961 |
| C | -0.17820 | -0.66186 | -0.55697 |
| C | 0.91820  | -0.33490 | 0.45652  |
| C | -1.75648 | -1.13946 | 1.42748  |
| C | -2.29162 | -1.95074 | -0.90116 |
| C | 3.02208  | -0.63517 | -0.85947 |
| C | 1.70647  | 1.47647  | -1.11542 |
| C | -2.30048 | 0.28661  | 1.54280  |
| C | -3.21983 | -0.77367 | -1.22461 |
| C | 3.94632  | -1.24296 | 0.19649  |
| C | 1.00548  | 2.59201  | -0.34054 |
| H | 0.20993  | -1.21023 | -1.41604 |
| H | -0.70263 | 0.22659  | -0.88536 |
| H | 0.55319  | 0.34245  | 1.22448  |

|   |          |          |          |
|---|----------|----------|----------|
| H | 1.30381  | -1.23916 | 0.93051  |
| H | -0.96134 | -1.25324 | 2.16588  |
| H | -2.55056 | -1.84033 | 1.67879  |
| H | -2.85952 | -2.75866 | -0.44518 |
| H | -1.79362 | -2.29705 | -1.80416 |
| H | 3.63118  | -0.11557 | -1.59945 |
| H | 2.44827  | -1.41143 | -1.36024 |
| H | 1.09109  | 1.09984  | -1.92766 |
| H | 2.62293  | 1.89042  | -1.53934 |
| H | -0.70816 | -2.46016 | 0.28398  |
| H | 2.63757  | 0.75735  | 0.58712  |

**thEDTA<sup>3-</sup>**

|   |           |           |           |
|---|-----------|-----------|-----------|
| O | 2.419931  | 3.498741  | -0.443891 |
| O | 4.458499  | -2.135015 | 0.846343  |
| O | -1.021463 | -2.347542 | 0.782835  |
| O | -4.335917 | 1.981028  | 1.036527  |
| O | 0.997513  | 2.322779  | 0.895537  |
| O | 3.411086  | -0.314823 | 1.741028  |
| O | -2.681817 | -3.384018 | -0.389542 |
| O | -3.349734 | 0.041929  | 1.598832  |
| N | 1.677582  | -0.129200 | -0.512024 |
| N | -1.556950 | 0.137249  | -0.603738 |
| C | 0.686835  | -0.419977 | -1.574843 |
| C | -0.512780 | 0.523526  | -1.582337 |
| C | 2.384214  | 1.135727  | -0.763940 |
| C | 2.607127  | -1.260852 | -0.377941 |
| C | -2.234385 | -1.116501 | -0.973446 |
| C | -2.490060 | 1.237694  | -0.370239 |
| C | 1.874963  | 2.386795  | -0.045557 |
| C | 3.546939  | -1.210016 | 0.823682  |
| C | -1.943214 | -2.349287 | -0.114886 |
| C | -3.387061 | 1.005479  | 0.820865  |
| H | 1.174750  | -0.364853 | -2.562768 |
| H | 0.335807  | -1.446491 | -1.447148 |
| H | -0.185703 | 1.541193  | -1.361850 |
| H | -0.938645 | 0.532449  | -2.598477 |
| H | 2.402035  | 1.374539  | -1.837490 |
| H | 3.428968  | 1.040036  | -0.456220 |
| H | 3.239032  | -1.388602 | -1.271697 |
| H | 2.026043  | -2.181344 | -0.268762 |
| H | -1.984748 | -1.398881 | -2.005118 |
| H | -3.320601 | -0.986837 | -0.959498 |
| H | -3.143938 | 1.444323  | -1.233906 |
| H | -1.930977 | 2.156780  | -0.168341 |
| H | -4.326699 | 2.721175  | 0.392123  |

**thEDTA<sub>a</sub><sup>2-</sup>**

|   |           |           |           |
|---|-----------|-----------|-----------|
| O | -1.896485 | -2.343453 | 1.990758  |
| O | -4.028746 | 2.744879  | -1.207859 |
| O | 3.712032  | -2.671437 | -0.541036 |
| O | 2.877465  | 3.541691  | 1.019093  |
| O | -1.380537 | -3.772796 | 0.288436  |
| O | -2.891298 | 2.428091  | 0.744666  |
| O | 2.031758  | -1.814790 | -1.762272 |
| O | 3.305448  | 2.259210  | -0.821254 |
| N | -2.257890 | -0.251895 | -0.020504 |
| N | 1.511645  | 0.245365  | 0.123191  |
| C | -0.905427 | 0.215351  | -0.404626 |
| C | 0.207907  | -0.392781 | 0.445448  |
| C | -2.419629 | -1.689890 | -0.307070 |
| C | -3.268641 | 0.524744  | -0.759106 |
| C | 2.636983  | -0.667996 | 0.329297  |
| C | 1.691393  | 1.491118  | 0.873647  |
| C | -1.842521 | -2.646926 | 0.737114  |
| C | -3.379617 | 1.997654  | -0.368041 |
| C | 2.731081  | -1.726631 | -0.743727 |
| C | 2.694270  | 2.422197  | 0.247623  |
| H | -0.707748 | -0.024735 | -1.463117 |
| H | -0.883309 | 1.300961  | -0.299083 |
| H | -0.023557 | -0.281181 | 1.513183  |
| H | 0.297258  | -1.460224 | 0.236138  |
| H | -1.987852 | -1.955168 | -1.282977 |
| H | -3.489081 | -1.919121 | -0.350372 |
| H | -4.255958 | 0.090499  | -0.578070 |
| H | -3.095633 | 0.491063  | -1.845909 |
| H | 2.591894  | -1.182020 | 1.302102  |
| H | 3.583040  | -0.119402 | 0.305847  |
| H | 2.000248  | 1.320341  | 1.915303  |
| H | 0.746054  | 2.037042  | 0.916335  |
| H | 4.224783  | -2.572288 | 0.290400  |
| H | 3.511679  | 4.187744  | 0.633810  |

**thEDTA<sub>o</sub><sup>2-</sup>**

|   |           |           |           |
|---|-----------|-----------|-----------|
| O | -4.866644 | 0.173233  | 0.206549  |
| O | -0.884458 | -2.791748 | 1.589285  |
| O | -0.731364 | 3.863765  | 0.281694  |
| O | 4.911866  | -0.433274 | -0.751248 |
| O | -3.413260 | 0.997944  | -1.348390 |
| O | 0.835378  | -3.598225 | 0.319132  |
| O | 0.130359  | 2.542515  | 1.931003  |
| O | 3.324735  | -1.038579 | 0.775855  |
| N | -1.489338 | -0.989661 | -0.643465 |
| N | 1.641199  | 1.112564  | -0.104371 |
| C | -0.598372 | 0.007771  | -0.007162 |

|   |           |           |           |
|---|-----------|-----------|-----------|
| C | 0.742595  | 0.111511  | -0.729040 |
| C | -2.806837 | -0.989465 | -0.010389 |
| C | -0.888287 | -2.324179 | -0.802155 |
| C | 1.144930  | 2.487123  | -0.297452 |
| C | 2.999910  | 0.962588  | -0.635478 |
| C | -3.673033 | 0.154183  | -0.474726 |
| C | -0.267477 | -2.935919 | 0.461855  |
| C | 0.103461  | 2.969908  | 0.714851  |
| C | 3.707425  | -0.261648 | -0.113920 |
| H | -1.116849 | 0.968131  | -0.042593 |
| H | -0.420889 | -0.239934 | 1.049562  |
| H | 1.248947  | -0.853616 | -0.691501 |
| H | 0.572178  | 0.364766  | -1.788402 |
| H | -2.763155 | -0.931356 | 1.085179  |
| H | -3.345239 | -1.908919 | -0.253842 |
| H | -0.121343 | -2.295765 | -1.575458 |
| H | -1.664726 | -3.012639 | -1.147627 |
| H | 0.723592  | 2.623584  | -1.302647 |
| H | 1.983026  | 3.183800  | -0.199591 |
| H | 3.615178  | 1.815969  | -0.339044 |
| H | 3.028741  | 0.913251  | -1.734236 |
| H | -5.470721 | 0.897576  | -0.073082 |
| H | 5.429437  | -1.201453 | -0.421202 |

***th*EDTA<sup>1-</sup>**

|   |           |           |           |
|---|-----------|-----------|-----------|
| O | 3.254628  | 3.159199  | -0.531960 |
| O | 4.553941  | -2.936138 | -0.476839 |
| O | -3.352076 | 2.577704  | 0.577237  |
| O | -4.937517 | -2.397065 | 0.111385  |
| O | 1.966924  | 2.326339  | 1.159152  |
| O | 4.485767  | -1.252142 | 1.062780  |
| O | -2.181245 | 1.898483  | -1.258952 |
| O | -4.405726 | -0.307783 | -0.646618 |
| N | 2.046245  | -0.275312 | -0.035136 |
| N | -1.717196 | -0.638354 | 0.102831  |
| C | 0.630491  | -0.130957 | -0.455840 |
| C | -0.312813 | -1.068054 | 0.299116  |
| C | 2.844630  | 0.823436  | -0.588216 |
| C | 2.595019  | -1.571743 | -0.467648 |
| C | -2.050197 | 0.595796  | 0.826405  |
| C | -2.672388 | -1.717145 | 0.365523  |
| C | 2.617217  | 2.131566  | 0.118615  |
| C | 3.975488  | -1.920462 | 0.085472  |
| C | -2.519714 | 1.706461  | -0.079005 |
| C | -4.054947 | -1.374973 | -0.115010 |
| H | 0.332237  | 0.901263  | -0.262899 |
| H | 0.527144  | -0.304420 | -1.538868 |
| H | -0.222806 | -2.087030 | -0.079533 |
| H | -0.047890 | -1.077535 | 1.366276  |

|   |           |           |           |
|---|-----------|-----------|-----------|
| H | 2.653221  | 0.987829  | -1.659381 |
| H | 3.908981  | 0.600798  | -0.484067 |
| H | 2.651947  | -1.642696 | -1.564675 |
| H | 1.930094  | -2.370370 | -0.132035 |
| H | -1.173804 | 0.985357  | 1.358602  |
| H | -2.818311 | 0.432633  | 1.587162  |
| H | -2.751666 | -1.973878 | 1.432790  |
| H | -2.361785 | -2.622479 | -0.160410 |
| H | 3.156021  | 4.029709  | -0.085208 |
| H | -3.626616 | 3.346925  | 0.029619  |
| H | -5.854407 | -2.202773 | -0.187201 |

**thEDTA<sup>0</sup>**

|   |           |           |           |
|---|-----------|-----------|-----------|
| O | -0.245684 | -4.127276 | -0.549569 |
| O | 4.371483  | 0.491107  | -0.284333 |
| O | 0.217497  | 4.144788  | -0.545627 |
| O | -4.358660 | -0.508520 | -0.280891 |
| O | 0.690913  | -2.402387 | -1.716902 |
| O | 2.260930  | 1.315268  | -0.568800 |
| O | -0.705337 | 2.413791  | -1.714806 |
| O | -2.244526 | -1.326513 | -0.557054 |
| N | 1.167369  | -0.988122 | 0.713708  |
| N | -1.161646 | 0.988205  | 0.713616  |
| C | 0.747661  | -0.178919 | 1.875928  |
| C | -0.737977 | 0.183613  | 1.877849  |
| C | 0.672362  | -2.360241 | 0.746760  |
| C | 2.600068  | -0.907316 | 0.449866  |
| C | -0.675192 | 2.363604  | 0.748571  |
| C | -2.594119 | 0.899636  | 0.449927  |
| C | 0.391200  | -2.913399 | -0.625929 |
| C | 3.005499  | 0.402784  | -0.177357 |
| C | -0.406267 | 2.924238  | -0.623598 |
| C | -2.993219 | -0.414867 | -0.171876 |
| H | 0.963834  | -0.703755 | 2.820045  |
| H | 1.349309  | 0.732162  | 1.880628  |
| H | -1.339982 | -0.727005 | 1.889518  |
| H | -0.950605 | 0.713063  | 2.820135  |
| H | -0.262723 | -2.412956 | 1.304889  |
| H | 1.365810  | -3.058354 | 1.240194  |
| H | 2.898283  | -1.690818 | -0.252040 |
| H | 3.213051  | -1.041331 | 1.353423  |
| H | 0.262922  | 2.420309  | 1.301525  |
| H | -1.370430 | 3.055260  | 1.248780  |
| H | -2.895370 | 1.678569  | -0.255704 |
| H | -3.208034 | 1.035082  | 1.352676  |
| H | -0.428851 | -4.532807 | -1.426536 |
| H | 4.683607  | 1.323441  | -0.705361 |
| H | 0.393536  | 4.555366  | -1.421774 |
| H | -4.667440 | -1.343647 | -0.698662 |

**EDTA<sup>4-</sup>/Hg<sup>2+</sup>**

|    |           |           |           |
|----|-----------|-----------|-----------|
| O  | 1.407914  | -3.683953 | 1.241244  |
| O  | 4.248397  | 1.329597  | -0.831786 |
| O  | -1.401187 | 3.682094  | 1.245702  |
| O  | -4.256319 | -1.311133 | -0.829421 |
| O  | 0.486718  | -2.308659 | -0.321485 |
| O  | 2.252344  | 0.486338  | -1.529919 |
| O  | -0.486357 | 2.306918  | -0.320874 |
| O  | -2.253302 | -0.486832 | -1.530116 |
| N  | 1.522238  | -0.026090 | 1.148895  |
| N  | -1.521254 | 0.024328  | 1.149802  |
| C  | 0.673643  | 0.358949  | 2.303623  |
| C  | -0.672211 | -0.364845 | 2.302822  |
| C  | 2.088876  | -1.382785 | 1.284781  |
| C  | 2.564556  | 0.972695  | 0.847480  |
| C  | -2.085079 | 1.381839  | 1.289288  |
| C  | -2.565880 | -0.971849 | 0.847313  |
| C  | 1.251390  | -2.525977 | 0.705853  |
| C  | 3.058567  | 0.910108  | -0.598718 |
| C  | -1.247679 | 2.524362  | 0.708883  |
| C  | -3.062162 | -0.903419 | -0.597870 |
| H  | 1.186539  | 0.132451  | 3.248252  |
| H  | 0.514368  | 1.439268  | 2.271974  |
| H  | -0.513206 | -1.445073 | 2.267409  |
| H  | -1.184582 | -0.141312 | 3.248452  |
| H  | 2.298812  | -1.617598 | 2.334160  |
| H  | 3.041767  | -1.425381 | 0.746194  |
| H  | 3.433339  | 0.877268  | 1.508522  |
| H  | 2.148675  | 1.974676  | 0.986135  |
| H  | -2.291046 | 1.615695  | 2.339656  |
| H  | -3.039788 | 1.426819  | 0.754083  |
| H  | -3.433193 | -0.876901 | 1.510286  |
| H  | -2.151169 | -1.974866 | 0.981918  |
| Hg | -0.000340 | -0.001027 | -0.872943 |

**EDTA<sup>3-</sup>/Hg<sup>2+</sup>**

|   |          |          |          |
|---|----------|----------|----------|
| O | -0.38411 | 0.54628  | -0.74826 |
| O | -1.03288 | 1.31044  | 2.24576  |
| O | 6.83493  | 0.25405  | -0.41389 |
| O | 1.10453  | -2.25481 | -0.47068 |
| O | -1.09718 | 2.04228  | -2.32026 |
| O | -1.82443 | 2.86007  | 0.76445  |
| O | 5.22735  | -0.71868 | -1.73496 |
| O | 0.42200  | -2.19746 | 1.71163  |
| N | 1.39002  | 2.48249  | 0.38655  |
| N | 3.39592  | -0.80386 | 0.16751  |
| C | 1.90896  | 1.11901  | 0.81667  |
| C | 2.64703  | 0.42438  | -0.32617 |
| C | 0.81217  | 2.62805  | -1.01021 |

|    |          |          |          |
|----|----------|----------|----------|
| C  | 0.47058  | 3.04540  | 1.46085  |
| C  | 4.78910  | -0.44898 | 0.61669  |
| C  | 2.67921  | -1.58911 | 1.23104  |
| C  | -0.31999 | 1.67401  | -1.37247 |
| C  | -0.88970 | 2.33751  | 1.49731  |
| C  | 5.68551  | -0.28106 | -0.61026 |
| C  | 1.29549  | -2.03743 | 0.78350  |
| H  | 2.57292  | 1.31882  | 1.65915  |
| H  | 1.05410  | 0.54541  | 1.15547  |
| H  | 1.94921  | 0.08682  | -1.08680 |
| H  | 3.38767  | 1.08372  | -0.77992 |
| H  | 1.62596  | 2.48995  | -1.72335 |
| H  | 0.45850  | 3.65447  | -1.09372 |
| H  | 0.33131  | 4.10035  | 1.23718  |
| H  | 0.98348  | 2.92091  | 2.41187  |
| H  | 5.18151  | -1.26286 | 1.22706  |
| H  | 4.76215  | 0.46206  | 1.21104  |
| H  | 2.61441  | -0.99634 | 2.13944  |
| H  | 3.27633  | -2.47851 | 1.43884  |
| H  | 2.21014  | 3.10559  | 0.38356  |
| H  | 3.51463  | -1.40131 | -0.66818 |
| Hg | -2.36822 | -0.66485 | -0.25836 |
| O  | -2.12957 | -1.78228 | 1.81687  |
| H  | -2.33292 | -1.18443 | 2.55970  |
| H  | -1.14719 | -2.01835 | 1.78825  |
| O  | -3.40972 | 1.42189  | -0.68756 |
| H  | -2.90007 | 2.00404  | -0.02787 |
| H  | -3.04774 | 1.60203  | -1.58314 |
| O  | -1.35496 | -2.56498 | -1.25849 |
| H  | -1.47988 | -2.66001 | -2.21992 |
| H  | -0.37660 | -2.50015 | -0.99691 |

### EDTA<sup>2-</sup>/Hg<sup>2+</sup>

|   |          |          |          |
|---|----------|----------|----------|
| O | -0.38411 | 0.54628  | -0.74826 |
| O | -1.03288 | 1.31044  | 2.24576  |
| O | 6.83493  | 0.25405  | -0.41389 |
| O | 1.10453  | -2.25481 | -0.47068 |
| O | -1.09718 | 2.04228  | -2.32026 |
| O | -1.82443 | 2.86007  | 0.76445  |
| O | 5.22735  | -0.71868 | -1.73496 |
| O | 0.42200  | -2.19746 | 1.71163  |
| N | 1.39002  | 2.48249  | 0.38655  |
| N | 3.39592  | -0.80386 | 0.16751  |
| C | 1.90896  | 1.11901  | 0.81667  |
| C | 2.64703  | 0.42438  | -0.32617 |
| C | 0.81217  | 2.62805  | -1.01021 |
| C | 0.47058  | 3.04540  | 1.46085  |
| C | 4.78910  | -0.44898 | 0.61669  |
| C | 2.67921  | -1.58911 | 1.23104  |
| C | -0.31999 | 1.67401  | -1.37247 |



|    |          |          |          |
|----|----------|----------|----------|
| C  | -0.88970 | 2.33751  | 1.49731  |
| C  | 5.68551  | -0.28106 | -0.61026 |
| C  | 1.29549  | -2.03743 | 0.78350  |
| H  | 2.57292  | 1.31882  | 1.65915  |
| H  | 1.05410  | 0.54541  | 1.15547  |
| H  | 1.94921  | 0.08682  | -1.08680 |
| H  | 3.38767  | 1.08372  | -0.77992 |
| H  | 1.62596  | 2.48995  | -1.72335 |
| H  | 0.45850  | 3.65447  | -1.09372 |
| H  | 0.33131  | 4.10035  | 1.23718  |
| H  | 0.98348  | 2.92091  | 2.41187  |
| H  | 5.18151  | -1.26286 | 1.22706  |
| H  | 4.76215  | 0.46206  | 1.21104  |
| H  | 2.61441  | -0.99634 | 2.13944  |
| H  | 3.27633  | -2.47851 | 1.43884  |
| H  | 2.21014  | 3.10559  | 0.38356  |
| H  | 3.51463  | -1.40131 | -0.66818 |
| Hg | -2.36822 | -0.66485 | -0.25836 |
| O  | -2.12957 | -1.78228 | 1.81687  |
| H  | -2.33292 | -1.18443 | 2.55970  |
| H  | -1.14719 | -2.01835 | 1.78825  |
| O  | -3.40972 | 1.42189  | -0.68756 |
| H  | -2.90007 | 2.00404  | -0.02787 |
| H  | -3.04774 | 1.60203  | -1.58314 |
| O  | -1.35496 | -2.56498 | -1.25849 |
| H  | -1.47988 | -2.66001 | -2.21992 |
| H  | -0.37660 | -2.50015 | -0.99691 |

***th*EDTA<sup>3-</sup>/Hg<sup>2+</sup>**

|   |           |           |           |
|---|-----------|-----------|-----------|
| O | 1.608454  | -3.822786 | 0.818733  |
| O | 4.350188  | 1.445630  | -0.531479 |
| O | -0.460390 | 2.309900  | 0.066847  |
| O | -4.183887 | -1.682706 | -0.732305 |
| O | 0.449947  | -2.275248 | -0.379941 |
| O | 2.453188  | 0.478684  | -1.350105 |
| O | -1.670826 | 3.589650  | 1.507445  |
| O | -2.868294 | 0.077132  | -1.200929 |
| N | 1.591298  | -0.160132 | 1.229991  |
| N | -1.486080 | -0.089965 | 1.275326  |
| C | 0.741397  | 0.114024  | 2.417546  |
| C | -0.598327 | -0.614571 | 2.353625  |
| C | 2.149732  | -1.528229 | 1.230012  |
| C | 2.647118  | 0.855906  | 1.053726  |
| C | -2.046441 | 1.237029  | 1.610707  |
| C | -2.534793 | -1.067831 | 0.946970  |
| C | 1.329247  | -2.605275 | 0.516222  |
| C | 3.189786  | 0.916315  | -0.373906 |
| C | -1.327408 | 2.450244  | 1.020664  |
| C | -3.173816 | -0.817047 | -0.398024 |
| H | 1.258331  | -0.196482 | 3.334996  |

|    |           |           |           |
|----|-----------|-----------|-----------|
| H  | 0.578263  | 1.192016  | 2.482289  |
| H  | -0.434494 | -1.679450 | 2.180037  |
| H  | -1.095343 | -0.514986 | 3.326924  |
| H  | 2.333428  | -1.876667 | 2.252635  |
| H  | 3.116815  | -1.519464 | 0.717231  |
| H  | 3.490168  | 0.695177  | 1.735219  |
| H  | 2.229317  | 1.843467  | 1.268439  |
| H  | -2.080665 | 1.378033  | 2.696821  |
| H  | -3.077978 | 1.305211  | 1.253403  |
| H  | -3.335192 | -1.090733 | 1.700399  |
| H  | -2.102304 | -2.071136 | 0.907720  |
| H  | -4.382026 | -2.376960 | -0.066648 |
| Hg | 0.081173  | 0.097858  | -0.720537 |
| O  | -0.331231 | 0.480259  | -3.059850 |
| H  | 0.407592  | 0.266163  | -3.659074 |
| H  | -1.172424 | 0.120359  | -3.397271 |

***th*EDTA<sub>a</sub><sup>2-</sup>/Hg<sup>2+</sup>**

|   |           |           |           |
|---|-----------|-----------|-----------|
| O | 1.162417  | -2.118130 | -0.926018 |
| O | 2.028971  | 2.190321  | 3.321751  |
| O | -5.123232 | -2.674908 | -0.774947 |
| O | -3.874550 | 3.635604  | -0.579490 |
| O | 0.292627  | -3.974206 | 0.061243  |
| O | 1.935769  | 1.869039  | 1.068805  |
| O | -4.032820 | -2.198361 | 1.130977  |
| O | -4.947260 | 2.019774  | 0.627380  |
| N | 0.608071  | -0.591210 | 1.430320  |
| N | -2.866629 | 0.158054  | 0.056146  |
| C | -0.782011 | -0.059183 | 1.374626  |
| C | -1.532387 | -0.489369 | 0.114347  |
| C | 0.640205  | -2.067066 | 1.470190  |
| C | 1.330719  | 0.025576  | 2.562047  |
| C | -3.812058 | -0.623761 | -0.745068 |
| C | -2.777270 | 1.537576  | -0.432889 |
| C | 0.685399  | -2.753296 | 0.102886  |
| C | 1.780220  | 1.463023  | 2.294520  |
| C | -4.298979 | -1.862231 | -0.030960 |
| C | -3.974166 | 2.370715  | -0.059169 |
| H | -1.340065 | -0.402728 | 2.256591  |
| H | -0.715722 | 1.030826  | 1.418399  |
| H | -0.945473 | -0.250800 | -0.784841 |
| H | -1.686654 | -1.570060 | 0.130280  |
| H | -0.215311 | -2.471522 | 2.022817  |
| H | 1.546877  | -2.393025 | 1.988522  |
| H | 2.237563  | -0.547370 | 2.771265  |
| H | 0.722273  | 0.027013  | 3.473825  |
| H | -3.385928 | -0.939294 | -1.710175 |
| H | -4.700260 | -0.027726 | -0.971877 |
| H | -2.658873 | 1.596009  | -1.525312 |

|    |           |           |           |
|----|-----------|-----------|-----------|
| H  | -1.908467 | 2.033173  | 0.004975  |
| H  | -5.296518 | -2.371116 | -1.692135 |
| H  | -4.627704 | 4.222843  | -0.343018 |
| Hg | 1.752590  | 0.181218  | -0.647131 |
| O  | 0.384070  | 1.870453  | -1.808074 |
| H  | -0.402527 | 1.500634  | -2.251477 |
| H  | 0.114697  | 2.539058  | -1.149257 |
| O  | 3.872535  | -0.883578 | 0.435450  |
| H  | 4.030172  | -0.380340 | 1.256848  |
| H  | 3.523044  | -1.770595 | 0.646835  |
| O  | 3.371627  | 0.604276  | -2.364822 |
| H  | 3.044896  | 0.721682  | -3.275752 |
| H  | 4.147379  | 0.013787  | -2.342493 |

***th*EDTA<sub>o</sub><sup>2-</sup>/Hg<sup>2+</sup>**

|   |           |           |           |
|---|-----------|-----------|-----------|
| O | -6.141378 | 0.039314  | 0.373140  |
| O | -2.314602 | -3.050351 | -0.821268 |
| O | -0.902220 | 1.064152  | 3.678267  |
| O | 2.554233  | 3.234261  | -2.200335 |
| O | -4.867592 | 1.805890  | -0.312008 |
| O | -0.217370 | -2.167770 | -0.828380 |
| O | 0.384665  | -0.326903 | 2.414367  |
| O | 1.678060  | 1.129489  | -2.192418 |
| N | -2.748659 | 0.055123  | -1.019415 |
| N | 0.359032  | 1.668008  | 0.306961  |
| C | -1.912838 | 0.584687  | 0.085268  |
| C | -0.935962 | 1.641522  | -0.441104 |
| C | -4.013036 | -0.498182 | -0.529331 |
| C | -2.005764 | -0.889099 | -1.886258 |
| C | 0.146452  | 2.007949  | 1.738359  |
| C | 1.260966  | 2.663005  | -0.308506 |
| C | -5.000909 | 0.579697  | -0.166149 |
| C | -1.485515 | -2.119802 | -1.130999 |
| C | -0.164888 | 0.824402  | 2.656418  |
| C | 1.816858  | 2.234520  | -1.639932 |
| H | -2.569470 | 1.028643  | 0.835372  |
| H | -1.369384 | -0.232682 | 0.578892  |
| H | -0.704933 | 1.436850  | -1.485312 |
| H | -1.400099 | 2.635316  | -0.387648 |
| H | -3.898947 | -1.145722 | 0.350387  |
| H | -4.479421 | -1.106498 | -1.308213 |
| H | -1.159238 | -0.373557 | -2.337896 |
| H | -2.673098 | -1.224999 | -2.680666 |
| H | -0.650903 | 2.750322  | 1.845430  |
| H | 1.066212  | 2.445963  | 2.137939  |
| H | 2.120543  | 2.840875  | 0.341317  |
| H | 0.757253  | 3.627705  | -0.452764 |
| H | -6.824152 | 0.707676  | 0.606278  |
| H | 2.971704  | 2.996530  | -3.059318 |

|    |          |           |           |
|----|----------|-----------|-----------|
| Hg | 1.330283 | -0.617311 | 0.173496  |
| O  | 2.721991 | -1.388928 | -1.741524 |
| H  | 2.322022 | -2.208680 | -2.087306 |
| H  | 2.461450 | -0.612240 | -2.281691 |
| O  | 3.425379 | 0.522734  | 0.976374  |
| H  | 3.108044 | 1.122479  | 1.679391  |
| H  | 3.826201 | 1.038963  | 0.251093  |
| O  | 2.135456 | -2.673560 | 1.315985  |
| H  | 1.720140 | -2.654376 | 2.199077  |
| H  | 1.795689 | -3.428403 | 0.798923  |

***th*EDTA<sup>1-</sup>/Hg<sup>2+</sup>**

|    |           |           |           |
|----|-----------|-----------|-----------|
| O  | -0.770952 | 1.551831  | 3.423116  |
| O  | -1.733985 | -4.055958 | 1.103625  |
| O  | 4.519442  | 2.924315  | -0.494111 |
| O  | 7.150837  | -1.389783 | -1.673869 |
| O  | 0.232251  | 1.759589  | 1.382378  |
| O  | -2.170793 | -1.958622 | 0.340812  |
| O  | 4.344543  | 1.769021  | 1.465683  |
| O  | 6.512121  | 0.384782  | -0.382335 |
| N  | 0.422127  | -1.079284 | 1.146549  |
| N  | 3.906381  | -0.640893 | -0.133298 |
| C  | 1.902015  | -0.898295 | 1.280369  |
| C  | 2.666285  | -1.427614 | 0.060234  |
| C  | -0.268412 | -0.468298 | 2.300831  |
| C  | 0.097284  | -2.526104 | 1.070922  |
| C  | 3.640326  | 0.713626  | -0.642433 |
| C  | 4.886638  | -1.360096 | -0.952685 |
| C  | -0.218969 | 1.035163  | 2.284727  |
| C  | -1.372784 | -2.857120 | 0.831553  |
| C  | 4.212213  | 1.801101  | 0.230557  |
| C  | 6.228778  | -0.684324 | -0.948646 |
| H  | 2.090885  | 0.168753  | 1.392561  |
| H  | 2.250180  | -1.398823 | 2.191962  |
| H  | 2.946143  | -2.470203 | 0.213018  |
| H  | 2.030926  | -1.380292 | -0.837206 |
| H  | 0.158746  | -0.815436 | 3.249794  |
| H  | -1.324859 | -0.747059 | 2.292179  |
| H  | 0.412519  | -3.037253 | 1.987482  |
| H  | 0.651706  | -2.966096 | 0.238727  |
| H  | 2.561217  | 0.903116  | -0.694545 |
| H  | 4.024645  | 0.850674  | -1.656545 |
| H  | 4.575442  | -1.462397 | -2.003334 |
| H  | 5.029031  | -2.368665 | -0.559012 |
| H  | -0.785353 | 2.535348  | 3.447590  |
| H  | 4.836415  | 3.674722  | 0.056689  |
| H  | 8.042030  | -0.973740 | -1.697939 |
| Hg | -2.497427 | 0.391975  | -0.620321 |
| O  | -0.207224 | 0.018827  | -1.090913 |

|   |           |           |           |
|---|-----------|-----------|-----------|
| H | 0.057522  | -0.443165 | -0.154358 |
| H | -0.111488 | -0.596773 | -1.842591 |
| O | -2.946258 | 2.008559  | 1.094777  |
| H | -2.292176 | 2.729430  | 1.168380  |
| H | -3.142149 | 1.628873  | 1.972354  |
| O | -3.294265 | -0.979941 | -2.472058 |
| H | -4.028924 | -0.579124 | -2.973203 |
| H | -3.541377 | -1.865263 | -2.144384 |
| O | -4.539318 | -0.853584 | 0.560660  |
| H | -3.815225 | -1.536681 | 0.563796  |
| H | -5.204749 | -1.045335 | -0.125040 |
| O | -3.365982 | 2.154063  | -2.021960 |
| H | -3.382612 | 3.032188  | -1.598033 |
| H | -3.027448 | 2.213390  | -2.934410 |

## References

[1] S.A. Thomas, J.-F. Gaillard, The molecular structure of aqueous Hg(II)-EDTA as determined by X-ray absorption spectroscopy, *J. Phys. Chem. A* 119 (2015) 2878-2884.
